# Supplementary material
Source: publisher figshare collection journal article supplement (https://gsajournals.figshare.com/articles/dataset/_/8085740)
Supplement: Supplementary file 1 [file 1]

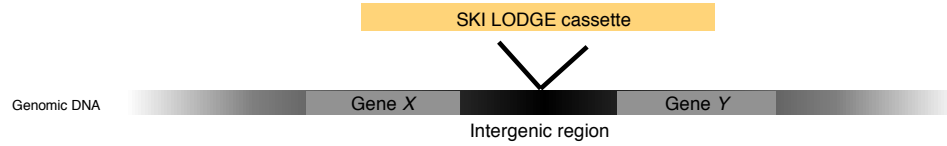

| SKI LODGE line                    | Templates (5' → 3')                                                                                                                                                                                                                                                                                                                                                                      | Number of Edits |                                          |                                   |                                |         |        |   |
|-----------------------------------|------------------------------------------------------------------------------------------------------------------------------------------------------------------------------------------------------------------------------------------------------------------------------------------------------------------------------------------------------------------------------------------|-----------------|------------------------------------------|-----------------------------------|--------------------------------|---------|--------|---|
| <i>myo-3p</i><br>Chr. I           | <table style="width: 100%; border: none;"> <tr> <td style="text-align: center;">(1)</td> <td style="text-align: center;">(2)</td> </tr> <tr> <td style="text-align: center;"><i>promoter</i></td> <td style="text-align: center;"><i>tag::dpy-10 site::3'UTR</i></td> </tr> <tr> <td style="text-align: center;">2573 bp</td> <td style="text-align: center;">806 bp</td> </tr> </table> | (1)             | (2)                                      | <i>promoter</i>                   | <i>tag::dpy-10 site::3'UTR</i> | 2573 bp | 806 bp | 2 |
| (1)                               | (2)                                                                                                                                                                                                                                                                                                                                                                                      |                 |                                          |                                   |                                |         |        |   |
| <i>promoter</i>                   | <i>tag::dpy-10 site::3'UTR</i>                                                                                                                                                                                                                                                                                                                                                           |                 |                                          |                                   |                                |         |        |   |
| 2573 bp                           | 806 bp                                                                                                                                                                                                                                                                                                                                                                                   |                 |                                          |                                   |                                |         |        |   |
| <i>pie-1p</i><br>Chr. III         | <table style="width: 100%; border: none;"> <tr> <td style="text-align: center;">1166 bp</td> <td style="text-align: center;"><i>tag::dpy-10 site::3'UTR</i><br/>806 bp</td> </tr> <tr> <td style="text-align: center;"><i>promoter</i></td> <td></td> </tr> </table>                                                                                                                     | 1166 bp         | <i>tag::dpy-10 site::3'UTR</i><br>806 bp | <i>promoter</i>                   |                                | 1       |        |   |
| 1166 bp                           | <i>tag::dpy-10 site::3'UTR</i><br>806 bp                                                                                                                                                                                                                                                                                                                                                 |                 |                                          |                                   |                                |         |        |   |
| <i>promoter</i>                   |                                                                                                                                                                                                                                                                                                                                                                                          |                 |                                          |                                   |                                |         |        |   |
| <i>rab-3p</i><br>Chr. IV          | <table style="width: 100%; border: none;"> <tr> <td style="text-align: center;">1405 bp</td> <td style="text-align: center;"><i>3'UTR</i><br/>732 bp</td> </tr> <tr> <td style="text-align: center;"><i>promoter::tag::dpy-10 site</i></td> <td></td> </tr> </table>                                                                                                                     | 1405 bp         | <i>3'UTR</i><br>732 bp                   | <i>promoter::tag::dpy-10 site</i> |                                | 1       |        |   |
| 1405 bp                           | <i>3'UTR</i><br>732 bp                                                                                                                                                                                                                                                                                                                                                                   |                 |                                          |                                   |                                |         |        |   |
| <i>promoter::tag::dpy-10 site</i> |                                                                                                                                                                                                                                                                                                                                                                                          |                 |                                          |                                   |                                |         |        |   |
| <i>eft-3p</i><br>Chr. V           | <table style="width: 100%; border: none;"> <tr> <td style="text-align: center;">682 bp</td> <td style="text-align: center;"><i>tag::dpy-10 site::3'UTR</i><br/>836 bp</td> </tr> <tr> <td style="text-align: center;"><i>promoter</i></td> <td></td> </tr> </table>                                                                                                                      | 682 bp          | <i>tag::dpy-10 site::3'UTR</i><br>836 bp | <i>promoter</i>                   |                                | 1       |        |   |
| 682 bp                            | <i>tag::dpy-10 site::3'UTR</i><br>836 bp                                                                                                                                                                                                                                                                                                                                                 |                 |                                          |                                   |                                |         |        |   |
| <i>promoter</i>                   |                                                                                                                                                                                                                                                                                                                                                                                          |                 |                                          |                                   |                                |         |        |   |

**Figure S1. Templates used to generate SKI LODGE lines.** SKI LODGE cassettes were introduced into intergenic regions on different chromosomes. Table shows templates that were used to insert SKI LODGE cassettes, and the number of CRISPR/Cas9 edits required to make the final line.
