# Supplementary material
Source: publisher figshare collection journal article supplement (https://gsajournals.figshare.com/articles/dataset/_/8085740)
Supplement: Supplementary file 2 [file 1]

**Table S1. Homology-directed repair (HDR) efficiencies of different inserts into SKI LODGE lines.**

| <b>Insert</b>                          | <b>Template size (bp)</b> | <b>% HDR in F1 dumpies (n)</b> | <b>Recipient SKI LODGE strain</b> |
|----------------------------------------|---------------------------|--------------------------------|-----------------------------------|
| Blunt-strand ends, Paix protocol       |                           |                                |                                   |
| wrmScarlet                             | 774                       | 8.57 (175)                     | <i>eft-3</i>                      |
| wrmScarlet                             | 774                       | 9.14 (175)                     | <i>rab-3</i>                      |
| wrmScarlet                             | 774                       | 13.04 (115)                    | <i>myo-3</i>                      |
| GFP                                    | 944                       | 11.46 (96)                     | <i>pie-1</i>                      |
| Template 1                             | 1872                      | 0.44 (227)                     | <i>rab-3</i>                      |
| Template 2                             | 2319                      | 2.08 (48)                      | <i>rab-3</i>                      |
| <i>crtc-1::wrmScarlet</i> <sup>a</sup> | 1534, 778                 | 13.39 (112)                    | <i>rab-3</i>                      |
| <i>unc-4::wrmScarlet</i> <sup>a</sup>  | 829, 778                  | 9.56 (136)                     | <i>rab-3</i>                      |
| Single-strand ends, Dokshin protocol   |                           |                                |                                   |
| wrmScarlet                             | 936/696                   | 13.33 (150)                    | <i>myo-3</i>                      |
| wrmScarlet                             | 936/696                   | 26.00 (150)                    | <i>eft-3</i>                      |

<sup>a</sup>Two templates with overlapping sequence.
