# Supplementary material
Source: publisher figshare collection journal article supplement (https://gsajournals.figshare.com/articles/dataset/_/8085740)
Supplement: Supplementary file 3 [file 1]

## Step by step guide to insert your favorite gene into the SKI LODGE strains

### Step 1

Select the SKI LODGE strain to express your gene of interest

### Step 2

Design primers with homologous recombination arms that contain at least 35 bp of SKI LODGE 3xFLAG sequence at the 5' end of the Forward primer, and at least 35 bp of the SKI LODGE 3'UTR sequences or SL2 sequence at the 5' end of the Reverse primer. Use the following models and table as a reference for primer designing.

Note: In your primer design, make sure the transcript to be inserted is in frame with the SKI LODGE epitope tag. The final correct edit should have your gene of interest in frame with the N-terminal epitope tag, followed immediately by SKI LODGE 3' UTR sequence or SL2 sequence. The entire *dpy-10* site will be removed.

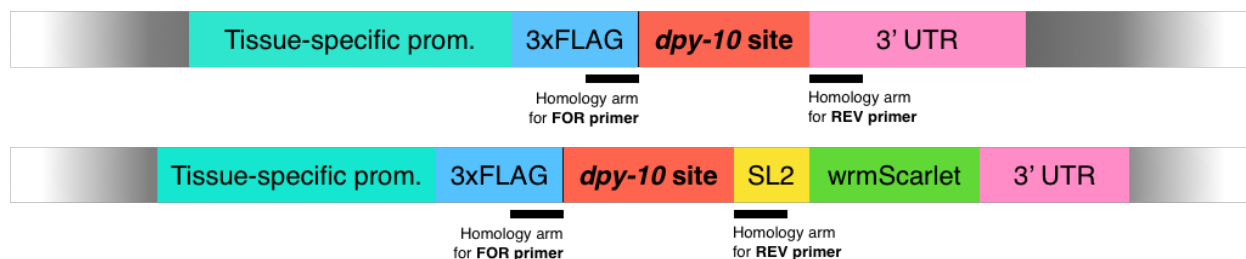

Sequences flanking *dpy-10* site in each SKI LODGE strain:

| SKI LODGE strain                               | Left homology arm for FOR primer (3xFLAG) (60 bases)               | Right homology arm for REV primer (3'UTR/SL2) (60 bases)           |                     |
|------------------------------------------------|--------------------------------------------------------------------|--------------------------------------------------------------------|---------------------|
| <i>myo-3p</i><br>Chr. I:2851000<br>(WBM1126)   | 5'aagaccatgacgggtgattataaagatcatgac<br>atcgattacaaggatgacgatgacaag | 5'agcatgtagggatgttgaagagtaattgga<br>cttagaagtcagaggcacgggcgcgagatg | <i>unc-54</i> 3'UTR |
| <i>pie-1p</i><br>Chr. III:7007700<br>(WBM1119) | 5'aagaccatgacgggtgattataaagatcatgac<br>atcgattacaaggatgacgatgacaag | 5'agcatgtagggatgttgaagagtaattgga<br>cttagaagtcagaggcacgggcgcgagatg | <i>unc-54</i> 3'UTR |

|                                                   |                                                                    |                                                                    |                     |
|---------------------------------------------------|--------------------------------------------------------------------|--------------------------------------------------------------------|---------------------|
| <i>rab-3p</i><br>Chr. IV:5014900<br>(WBM1141)     | 5'aagaccatgacggtgattataaagatcatgac<br>atcgattacaaggatgacgatgacaag  | 5'gcgtttggaatttgggaaaatttgagtttta<br>tagatagtataatagaacgtagaattt   | <i>rab-3 3'UTR</i>  |
| <i>eft-3p</i><br>Chr. V:8644800<br>(WBM1140)      | 5'aagaccatgacggtgattataaagatcatgac<br>atcgattacaaggatgacgatgacaag  | 5'agcatgtagggatgttgaagagtaattgga<br>cttagaagtcagaggcacgggcgcgagatg | <i>unc-54 3'UTR</i> |
| <i>eft-3p</i><br>Chr. IV:5014900<br>(WBM1179)     | 5'aagaccatgacggtgattataaagatcatgac<br>atcgattacaaggatgacgatgacaag  | 5'agcatgtagggatgttgaagagtaattgga<br>cttagaagtcagaggcacgggcgcgagatg | <i>unc-54 3'UTR</i> |
| <i>rab-3p SL2</i><br>Chr. IV:5014900<br>(WBM1215) | 5'aagaccatgacggtgattataaagatcatgac<br>atcgattacaaggatgacgacgataag  | 5'taaagagaagcatagattttaagacaagca<br>gttaactaggtgaaagtaggatgagacagc | SL2                 |
| <i>eft-3p SL2</i><br>Chr. V:8644800<br>(WBM1214)  | 5'aagaccatgacggtgattataaagatcatgac<br>atcgattacaaggatgacgacgataag  | 5'taaagagaagcatagattttaagacaagca<br>gttaactaggtgaaagtaggatgagacagc | SL2                 |
| <i>ges-1p SL2</i><br>Chr. V:8644800<br>(WBM1216)  | 5'aaggaccatgacggtgattataaagatcatga<br>catcgattacaaggatgacgacgataag | 5'taaagagaagcatagattttaagacaagc<br>agttaactaggtgaaagtaggatgagacagc | SL2                 |

Removing N-terminal epitope tag. To remove 3xFLAG tag, the Forward primer needs to contain an arm with at least 35 bp of SKI LODGE promoter sequences at the 5' end instead of the 3xFLAG sequence. The final correct edit should have the specific SKI LODGE promoter, then your gene of interest, followed immediately by SKI LODGE 3' UTR sequence or SL2 sequence. The entire 3xFLAG sequence and *dpy-10* site will be removed. Use the following models and table as a reference for primer designing when the 3xFLAG is not desired.

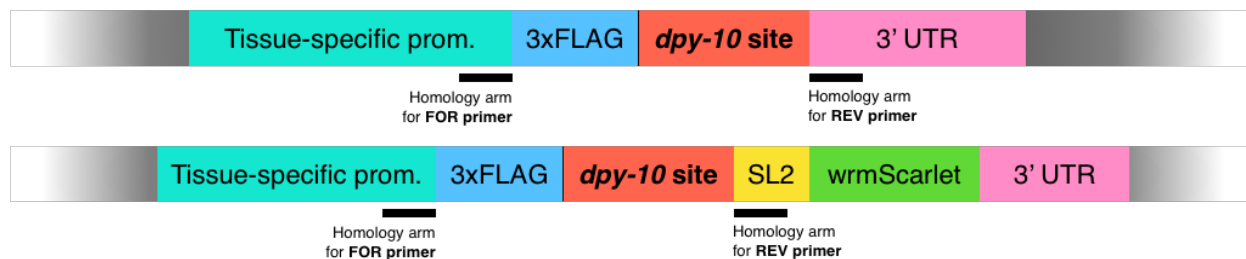

Sequences flanking 3xFLAG::*dpy-10* site in each SKI LODGE strain:

| SKI LODGE strain            | Left homology arm for <b>FOR primer</b> (end of promoter) (60 bases) | Right homology arm for <b>REV primer</b> (3'UTR/SL2) (60 bases)    |                     |
|-----------------------------|----------------------------------------------------------------------|--------------------------------------------------------------------|---------------------|
| <i>myo-3p</i> (WBM1126)     | 5'cactttaccgtctaattttcagggcagggagc<br>catcaaacccacgaccactagatccat    | 5'agcatgtagggatgttgaagagtaattgga<br>cttagaagtcagaggcacgggcgcgagatg | <i>unc-54 3'UTR</i> |
| <i>pie-1p</i> (WBM1119)     | 5'aggtttcttttgcagtatttcgttccaaacaa<br>ttaaaatcaaatctttccag           | 5'agcatgtagggatgttgaagagtaattgga<br>cttagaagtcagaggcacgggcgcgagatg | <i>unc-54 3'UTR</i> |
| <i>rab-3p</i> (WBM1141)     | 5'tgctcttttaaataaatctacagtagccctatt<br>tcagatgacaagttgtaccccg        | 5'gcgtttggaatttgggaaattttgagttttat<br>agatagtataatagaacgtagaattt   | <i>rab-3 3'UTR</i>  |
| <i>eft-3p</i> (WBM1140)     | 5'cgccactcttctacttttaaattaaattgtttttt<br>cagttgggaacactttgctca       | 5'agcatgtagggatgttgaagagtaattgga<br>cttagaagtcagaggcacgggcgcgagatg | <i>unc-54 3'UTR</i> |
| <i>eft-3p</i> (WBM1179)     | 5'cgccactcttctacttttaaattaaattgtttttt<br>cagttgggaacactttgctca       | 5'agcatgtagggatgttgaagagtaattgga<br>cttagaagtcagaggcacgggcgcgagatg | <i>unc-54 3'UTR</i> |
| <i>rab-3p SL2</i> (WBM1215) | 5'tgctcttttaaataaatctacagtagccctatt<br>tcagatgacaagttgtaccccg        | 5'taaagagaagcatagattttaagacaagca<br>gttaactaggtgaaagtaggatgagacagc | SL2                 |
| <i>eft-3p SL2</i> (WBM1214) | 5'cgccactcttctacttttaaattaaattgtttttt<br>cagttgggaacactttgctca       | 5'taaagagaagcatagattttaagacaagca<br>gttaactaggtgaaagtaggatgagacagc | SL2                 |
| <i>ges-1p SL2</i> (WBM1216) | 5'tcgtctgcgtcttacagtttcaggttcaaaaa<br>tctattacatatcttatcttgaattc     | 5'taaagagaagcatagattttaagacaagca<br>gttaactaggtgaaagtaggatgagacagc | SL2                 |

### Step 3

Make a mastermix with your newly designed primers and amplify your homology repair template by PCR using the following conditions:

| Reagent               | Volume (μl) |
|-----------------------|-------------|
| H <sub>2</sub> O      | Up to 300   |
| FOR primer (100 μM)   | 1.5         |
| REV primer (100 μM)   | 1.5         |
| DNA template          | 400-600 ng  |
| Phusion 2x Master Mix | 150         |

Divide mastermix between 6 PCR tubes, 50 µl per tube. Use the following gradient and PCR cycle conditions:

| Tube | Tm    | PCR cycle steps |                     |            |
|------|-------|-----------------|---------------------|------------|
| 1    | 60 °C | <b>1</b>        | 98° 2'              | 35x cycles |
| 2    | 62 °C | <b>2</b>        | 98° 30"             |            |
| 3    | 64 °C | <b>3</b>        | <b>Gradient 30"</b> |            |
| 4    | 66 °C | <b>4</b>        | 72° *               |            |
| 5    | 68 °C | <b>5</b>        | 72° 10'             |            |
| 6    | 70 °C | <b>6</b>        | 4° ∞                |            |

\*Extension time will depend of the length of your gene of interest. The typical recommendation is to allow 1 min of extension time for every 1 kb to be amplified.

#### Step 4

Check PCR products on a gel to verify that the Homologous Recombination (HR) template has amplified as a clean single band. Add 5 µl of 10x orange loading buffer to each sample and run 5 µl on a 1% agarose gel.

#### Step 5

Purify and concentrate your homology repair template by pooling all reactions that amplified as a strong single band into a single sample, and pass it through a Qiagen minelute column (#28006). Follow kit instructions, and elute with 10 µl of water. Determine the concentration of your purified template.

#### Step 6

Assemble of CRISPR/Cas9 complex *in vitro*:

| Reagent                         | Volume (µl) |
|---------------------------------|-------------|
| H <sub>2</sub> O                | Up to 10    |
| Hepes pH7.4 (200 mM)            | 0.375       |
| KCl (1 M)                       | 0.25        |
| tracrRNA (4 µg/µl)              | 2.5         |
| <i>dpy-10</i> crRNA (2.6 µg/µl) | 0.6         |
| <i>dpy-10</i> ssODN (500 ng/µl) | 0.25        |
| <b>PCR Template (ng/µl)</b>     | *           |
| Purified Cas9 (12 µg/µl)        | 2.0         |
| Total:                          | 10 µl       |

\*Note that we have had great success getting CRISPR edits using a final concentration of HR template of 400-600 ng/µl in the CRISPR mix.

Injection mixes can be prepared in advance without Cas9 protein, separated into 2 tubes of 4 µl, and stored at -80°C. We have found that frozen mixes stored up to one year at -80°C are still effective at generating CRISPR edits. Before injecting, thaw one 4 µl mix, add 1 µl purified Cas9 (12 µg/µl), mix by pipetting, spin for 2 min at 13000 rpm, and incubate at 37°C for 10 min. Inject into day 1 adults of the relevant SKI LODGE line.

### Step 7

3-4 days after injection, screen for plates that have produced many dumpy and/or roller progenies. From these plates, individually plate single *dpy* animals and allow them to lay eggs before screening them for your desired edit, either by looking for fluorescent expression and/or genotyping them by PCR. We have annotated forward primers close to the end of every tissue-specific promoter, and reverse primers at the beginning of 3'UTR or wrmScarlet that can be used for screening, genotyping, and sequencing your desired edit. Use the next models and table as a reference for primer designing.

Note: if you design new primers for genotyping, choose them outside of the homology arms to look for successful insertion.

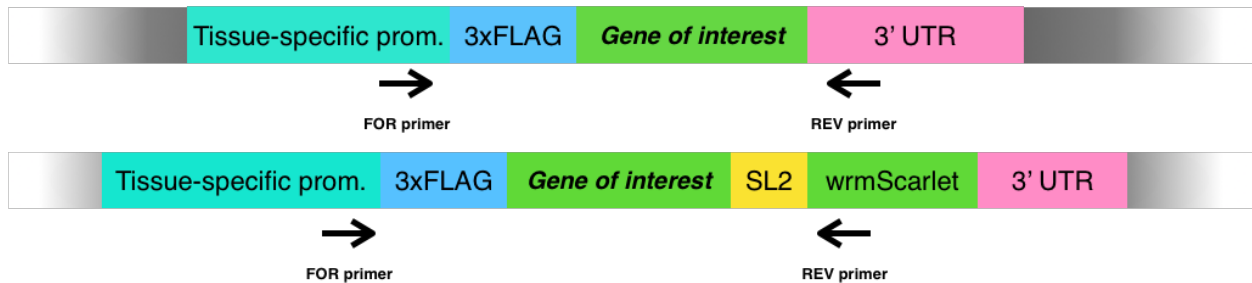

Primers flanking the insertion in each SKI LODGE cassette:

| SKI LODGE strain           | FOR primer<br>(end of promoter)          | REV primer<br>(beginning of 3'UTR/wrmScarlet) | SKI LODGE band<br>without insertion (bp) |
|----------------------------|------------------------------------------|-----------------------------------------------|------------------------------------------|
| <i>myo-3p</i><br>(WBM1126) | CGSG 123<br>5' ggattcttgctgtcaaccagc     | CGSG 117<br>5' aatagggggtgggagcacag           | 279                                      |
| <i>pie-1p</i><br>(WBM1119) | CGSG 130<br>5' cggcggcaaaatggattctc      | CGSG 117<br>5' aatagggggtgggagcacag           | 299                                      |
| <i>rab-3p</i><br>(WBM1141) | CGSG 105<br>5' ctacagtagccctatttcagatgac | CGSG 168<br>5' ggaaaactgagagctacgcgc          | 243                                      |

|                                |                                                      |                                      |     |
|--------------------------------|------------------------------------------------------|--------------------------------------|-----|
| <i>eft-3p</i><br>(WBM1140)     | <i>eft-3p</i> seq fwd 2<br>5' ctaccgtccgcactcttctta  | CGSG 117<br>5' aataggggggtgggagcacag | 255 |
| <i>eft-3p</i><br>(WBM1179)     | <i>eft-3p</i> seq fwd 2<br>5' ctaccgtccgcactcttctta  | CGSG 117<br>5' aataggggggtgggagcacag | 255 |
| <i>rab-3p SL2</i><br>(WBM1215) | CGSG 105<br>5' ctacagtagccctatttcagatgac             | CGSG 285<br>5' ttgagcttggcgggttggg   | 598 |
| <i>eft-3p SL2</i><br>(WBM1214) | <i>eft-3p</i> seq fwd_2<br>5' ctaccgtccgcactcttctta  | CGSG 285<br>5' ttgagcttggcgggttggg   | 555 |
| <i>ges-1p SL2</i><br>(WBM1216) | <i>ges-1p</i> INT SEQ<br>5' cgtctgcgtcttacagtttcaggc | CGSG 285<br>5' ttgagcttggcgggttggg   | 546 |

### Step 8

From those F1 positives, individually plate single F2 *dpy* animals again, allow them to lay eggs and then screen them. Continue doing this until getting homozygous animals for your desired edit. Confirm that the knock-in CRISPR edit is correct by sequencing.

### Step 9

Outcross your newly made SKI LODGE line to get rid of the *dpy-10* Co-CRISPR edit, as well as any other off-site mutations. Note that a good outcrossing genotyping strategy is necessary since outcrossing will be done using the N2 strain and not SKI LODGE strains. The following models and table show primers flanking the SKI LODGE cassette that can be used to outcross the new SKI LODGE line to N2. We also recommend designing an internal Forward primer close to the 3' end of your knocked in gene or use CGSG 167 primer localized at the end of *wrmScarlet* for SL2 lines. Using this 3 primer PCR strategy, you will obtain a SKI LODGE knock-in band around 1000 bp.

Figure of final SKI LODGE strains after knock in, and positions for primers:

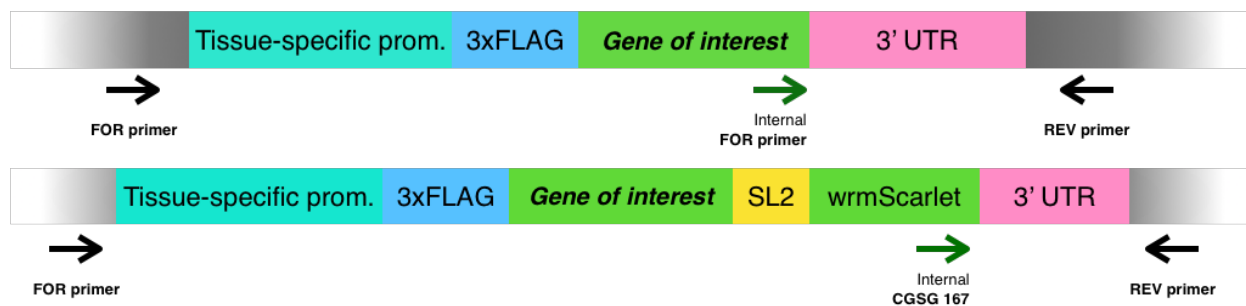

Primers flanking each SKI LODGE cassette for outcrossing:

| SKI LODGE strain               | FOR primer                              | REV primer                               | Wild-type band (bp) |
|--------------------------------|-----------------------------------------|------------------------------------------|---------------------|
| <i>myo-3p</i><br>(WBM1126)     | CGSG 143<br>5' taagcttctcacacctttctctcg | CGSG 124<br>5' cctccccctcatctcaattatcccg | 245                 |
| <i>pie-1p</i><br>(WBM1119)     | CGSG 129<br>5' cctgggaacaataagtcggtgaag | CGSG 131<br>5' atgtctggcgggtccaaagtg     | 441                 |
| <i>rab-3p</i><br>(WBM1141)     | CGSG 104<br>5' gaactttgcagtttggttagtg   | CGSG 106<br>5' tcaatccgttcatttgagccc     | 252                 |
| <i>eft-3p</i><br>(WBM1140)     | CGSG 205<br>5' acctcgacctcactttccctc    | CGSG 206<br>5' ccgtcctgaagtatacccagatcc  | 357                 |
| <i>eft-3p</i><br>(WBM1179)     | CGSG 104<br>5' gaactttgcagtttggttagtg   | CGSG 106<br>5' tcaatccgttcatttgagccc     | 252                 |
| <i>rab-3p SL2</i><br>(WBM1215) | CGSG 104<br>5' gaactttgcagtttggttagtg   | CGSG 106<br>5' tcaatccgttcatttgagccc     | 252                 |
| <i>eft-3p SL2</i><br>(WBM1214) | CGSG 205<br>5' acctcgacctcactttccctc    | CGSG 206<br>5' ccgtcctgaagtatacccagatcc  | 357                 |
| <i>ges-1p SL2</i><br>(WBM1216) | CGSG 205<br>5' acctcgacctcactttccctc    | CGSG 206<br>5' ccgtcctgaagtatacccagatcc  | 357                 |

### Step 10 (optional)

The major predicted off-target site of the *dpy-10* crRNA is in an exon of R12E2.15. After outcrossing, to check potential off-target events from the *dpy-10* crRNA, we recommend using primers CGSG 273 and 274. These primers amplify a fragment of 873 bp from the R12E2.15 gene flanking the potential off-target sequence. Use this PCR product for sequencing with the same primers.
