# Supplementary material
Source: publisher figshare collection journal article supplement (https://gsajournals.figshare.com/articles/dataset/_/8085740)
Supplement: Supplementary file 4 [file 1]

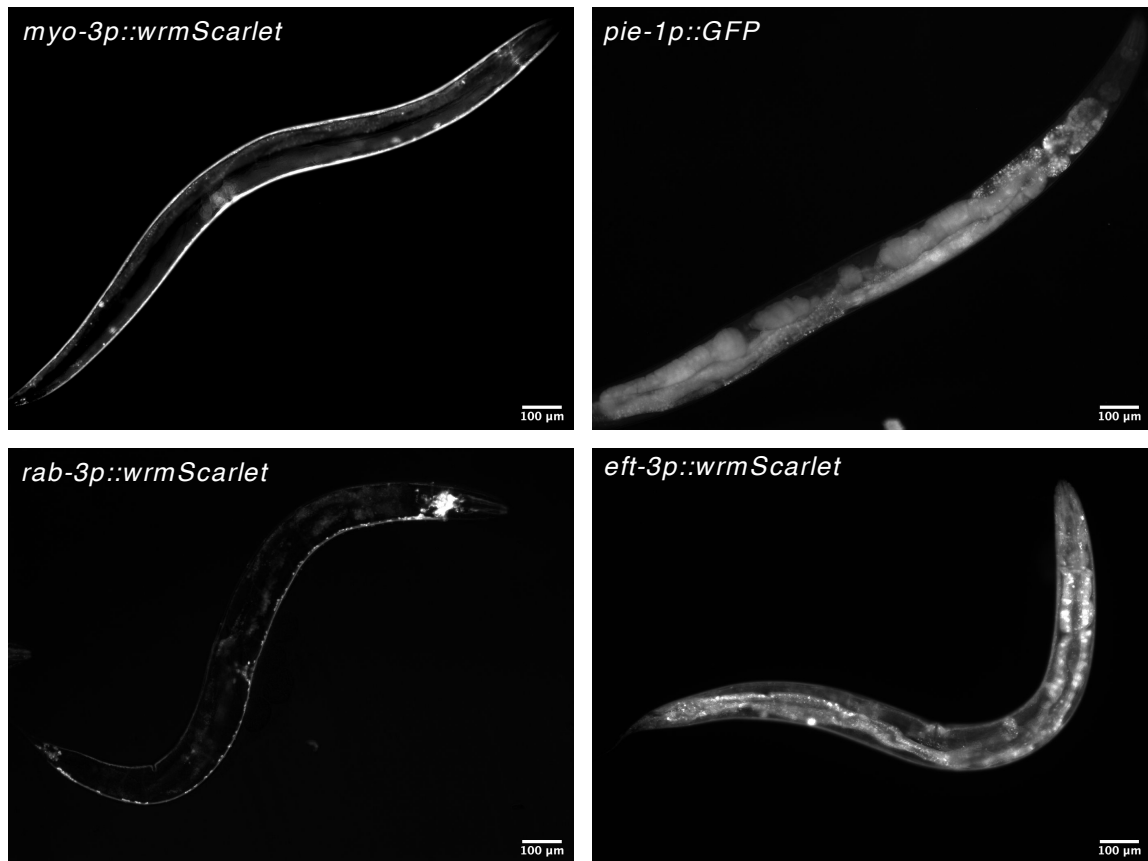

**Figure S3. SKI LODGE lines maintain tissue-specific expression with age.** SKI LODGE strains were tested by knock-in of a fluorescent protein. wrmScarlet was used to confirm ubiquitous, muscle and neuronal expression from the *eft-3*, *myo-3*, and *rab-3* SKI LODGE cassettes, respectively. GFP was used to confirm germline expression in the *pie-1* SKI LODGE. Pictures of six-day old animals.
