# Supplementary material
Source: publisher figshare collection journal article supplement (https://gsajournals.figshare.com/articles/dataset/_/8085740)
Supplement: Supplementary file 5 [file 1]

**Table S2. Future pipeline for SKI LODGE lines.**

| <b>Aim</b>                                        | <b>Description</b>                                                                                                                                      |
|---------------------------------------------------|---------------------------------------------------------------------------------------------------------------------------------------------------------|
| Add additional promoters                          | We will add additional tissue-specific promoters.                                                                                                       |
| Rapid promoter switching for any desired promoter | Flank SKI LODGE promoters with matching crRNA site sequence, enabling one step promoter switching.                                                      |
| Introduce SL2 sequence                            | Introduce an SL2 sequence after the <i>dpy-10</i> site to facilitate trans splicing with a fluorescent protein without generating fusions.              |
| Fluorescence selection                            | Modified SKI LODGE cassette with <i>dpy-10::STOP::fluorescent protein</i> . Knock in will remove <i>dpy-10::STOP</i> to allow selection by fluorescence |
