# Supplementary material
Source: publisher figshare collection journal article supplement (https://gsajournals.figshare.com/articles/dataset/_/8085740)
Supplement: Supplementary file 6 [file 1]

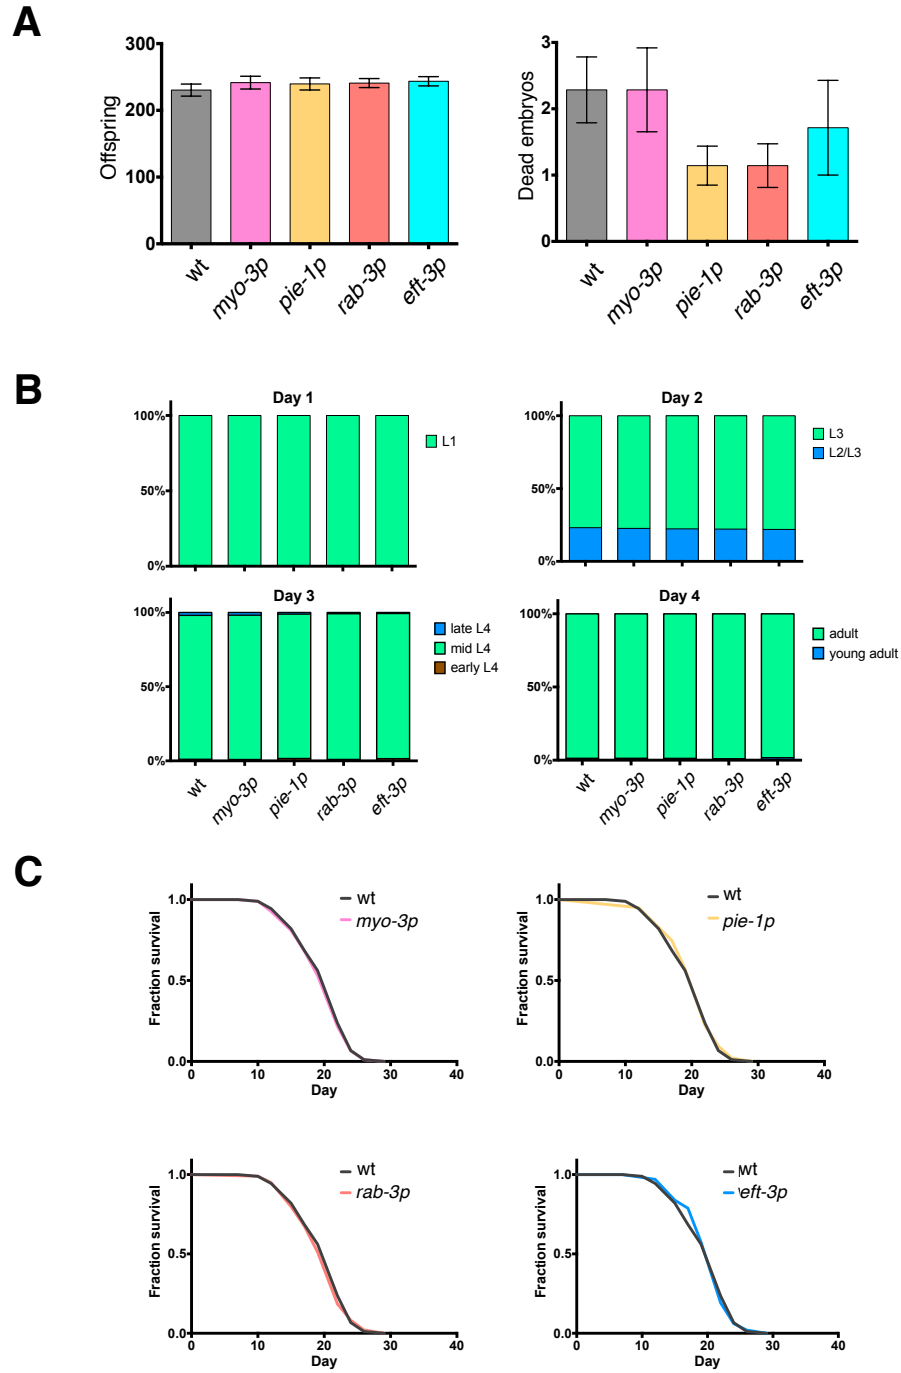

**Figure S2. Phenotypes analyzed in SKI LODGE lines.** All SKI LODGE lines produced wild type numbers of progeny and wild type levels of embryonic lethality (A), as well as wild type developmental timing (B) and lifespan (C). Values shown in a and b are an average of two independent replicates, error bars represent SEM. c is showing one replicate of two.
