# Supplementary material
Source: publisher figshare collection journal article supplement (https://gsajournals.figshare.com/articles/dataset/_/8085740)
Supplement: Supplementary file 7 [file 1]

## SUPPLEMENTAL MATERIALS AND METHODS

### Strains and maintenance

Bristol N2 strain was provided by the Caenorhabditis Genetics Center (CGC), University of Minnesota. All worms were grown on nematode growth medium (NGM) agar plates seeded with the *Escherichia coli* bacterial strain OP50-1 and maintained using standard procedures (Brenner 1974).

### Strains generated in this work and sequences

All strains generated in this work are listed in Table 1, and will be available for distribution through the CGC. All sequences files for SKI LODGE lines are available at <https://www.themairlab.com/skilodge>. All oligonucleotides, crRNAs, tracrRNA and repair templates used in this study are listed in Tables 2 and 3.

**Table 1. Strains generated in this work.**

| Strain            | Genotype                                                                                   | crRNA used                                       | Recipient strain | Outcrossing |
|-------------------|--------------------------------------------------------------------------------------------|--------------------------------------------------|------------------|-------------|
| SKI LODGE strains |                                                                                            |                                                  |                  |             |
| WBM1119           | <i>N2, wbmIs60[pie-1p::3XFLAG::dpy-10 crRNA::unc-54 3'UTR, III:7007600]</i>                | <i>crRNA oxTi444 Chr.III</i>                     | N2               | 6x          |
| WBM1126           | <i>N2, wbmIs61[myo-3p::3XFLAG::dpy-10 crRNA::unc-54 3'UTR, I:2851000]</i>                  | <i>crRNA ttTi4348 Chr.I myo-3(8d) SKIS</i>       | N2               | 6x          |
| WBM1140           | <i>N2, wbmIs65[eft-3p::3XFLAG::dpy-10 crRNA::unc-54 3'UTR, V:8645000]</i>                  | <i>crRNA oxTi365 Chr. V</i>                      | N2               | 6x          |
| WBM1141           | <i>N2, wbmIs66[rab-3p::3XFLAG::dpy-10 crRNA::rab-3 3'UTR, IV:5015000]</i>                  | <i>cxTi10816 crRNA Chr. IV</i>                   | N2               | 6x          |
| WBM1179           | <i>N2, wbmIs76[eft-3p::3XFLAG::dpy-10 crRNA::unc-54 3'UTR, IV:5015000]</i>                 | <i>cxTi10816 crRNA Chr. IV</i>                   | N2               | 6x          |
| WBM1214           | <i>N2, wbmIs88[eft-3p::3XFLAG::dpy-10 crRNA::SL2::wormScarlet::unc-54 3'UTR, *wbmIs67]</i> | <i>3xFLAG crRNA</i>                              | WBM1143          | 6x          |
| WBM1215           | <i>N2, wbmIs89[rab-3p::3XFLAG::dpy-10 crRNA::SL2::wormScarlet::rab-3 3'UTR, *wbmIs68]</i>  | <i>3xFLAG crRNA</i>                              | WBM1144          | 6x          |
| WBM1216           | <i>N2, wbmIs96[ges-1p::3XFLAG::dpy-10 crRNA::SL2::wormScarlet::unc-54 3'UTR, *wbmIs88]</i> | <i>SKI eft-3p 5' end crRNA + 3xFLAG crRNA #2</i> | WBM1214          | 6x          |

| Tested SKI LODGE strains             |                                                                            |                                |         |    |
|--------------------------------------|----------------------------------------------------------------------------|--------------------------------|---------|----|
| WBM1133                              | <i>N2, wbmIs63[myo-3p::3XFLAG::wrmScarlet::unc-54 3'UTR, *wbmIs61]</i>     | <i>dpy-10</i>                  | WBM1126 | 4x |
| WBM1143                              | <i>N2, wbmIs67[eft-3p::3XFLAG::wrmScarlet::unc-54 3'UTR, *wbmIs65]</i>     | <i>dpy-10</i>                  | WBM1140 | 6x |
| WBM1144                              | <i>N2, wbmIs68[rab-3p::3XFLAG::wrmScarlet::rab-3 3'UTR, *wbmIs66]</i>      | <i>dpy-10</i>                  | WBM1141 | 6x |
| WBM1153                              | <i>N2, wbmIs72[pie-1p::3XFLAG::GFP::unc-54 3'UTR, *wbmIs60]</i>            | <i>dpy-10</i>                  | WBM1119 | 4x |
| WBM1164                              | <i>N2, wbmIs77[eft-3p::3XFLAG::GFP::unc-54 3'UTR, *wbmIs65]</i>            | <i>dpy-10</i>                  | WBM1140 | 6x |
| Other strains generated in this work |                                                                            |                                |         |    |
| WBM1043                              | <i>N2, wbmIs53[rab-3p::3XFLAG::dpy-10 crRNA::unc-54 3'UTR, IV:5015000]</i> | <i>cxTi10816 crRNA Chr. IV</i> | N2      | 6x |
| WBM1063                              | <i>N2, wbmIs57[rab-3p::3XFLAG::wrmScarlet::unc-54 3'UTR *wbmIs53]</i>      | <i>dpy-10</i>                  | WBM1043 | 2x |
| WBM1139                              | <i>N2, wbmIs64[pie-1p::3XFLAG::wrmScarlet::unc-54 3'UTR *wbmIs60]</i>      | <i>dpy-10</i>                  | WBM1119 | 2x |

**Table 2. crRNAs and tracrRNA used in this work.**

| crRNA name                                        | Target gene/region     | Sequence (5'>3')                                                            |
|---------------------------------------------------|------------------------|-----------------------------------------------------------------------------|
| <i>dpy-10 crRNA</i> (Arribere <i>et al.</i> 2014) | <i>dpy-10</i>          | gctaccataggcaccacgag                                                        |
| <i>dpy-5 crRNA</i>                                | <i>dpy-5</i>           | ccaggaatgccaggaccacg                                                        |
| <i>crRNA ttTi4348 Chr.I</i>                       | I:2851000              | ttttgtcaaaagaagagaca                                                        |
| <i>myo-3(8d) SKIS</i>                             | I:2851000              | gaaatcgccgacttgcgagg                                                        |
| <i>crRNA oxTi444 Chr.III</i>                      | III:7007600            | ggtatatagttaaataaacg                                                        |
| <i>cxTi10816 crRNA Chr. IV</i>                    | IV:5015000             | acaagtgtgaaactaaactt                                                        |
| <i>crRNA oxTi365 Chr. V</i>                       | V:8645000              | aacaagttgggacaatacgg                                                        |
| <i>3xFLAG crRNA</i>                               | 3xFLAG                 | ttacaaggatgacgatgaca                                                        |
| <i>3xFLAG crRNA #2</i>                            | 3xFLAG                 | atggactacaaagaccatga                                                        |
| <i>SKI eft-3p 5' end crRNA</i>                    | <i>eft-3 SKI LODGE</i> | taaaagaccaaaggtgccgg                                                        |
| <i>tracrRNA</i>                                   | NA                     | aacagcauagcaaguuaaaaaaaggcuaguccguuaucaacuugaaaa<br>aguggcaccgagucggugcuuuu |

### Identification of harbor loci

To identify safe harbor loci to knock in the SKI LODGE cassettes, we analyzed genomic regions used in the MosSCI system (Frøkjær-Jensen *et al.* 2014) (Figure 1B). SKI LODGE sites were chosen using the following basic requirements: each was in an intergenic region so as not to affect other gene expression or function, and each had a strong crRNA guide site as determined by MIT CRISPR design (<http://crispr.mit.edu>) and/or Benchling (<https://benchling.com>) platforms (Table 2). We chose the following chromosome positions to insert SKI LODGE cassettes: *myo-3p* (Chr. I:2851000), *pie-1p* (Chr. III:7007700), *rab-3p* and *eft-3p* (Chr. IV:5014900), and *eft-3p* and *ges-1p* (Chr. V:8644800).

### Cas9 purification

Cas9-His-tagged was purified by overexpressing in *E. coli* BL21 Rosetta cells. Nickel-NTA beads were used to pull it down followed by HPLC purification. Briefly, we inoculated LB culture with SpCas9 containing *E. coli* Rosetta cells and agitated for 3-6 h until the culture reached an OD of 0.6-0.8. The culture was cooled down on ice water to below 20°C, and 0.5 mM IPTG was added followed by incubation overnight in a shaker at 20°C. The culture was spun, and the bacterial pellet was resuspended in 27.5 ml of 50 mM Tris pH 8, 150 mM NaCl, 10% glycerol and 2 mM TCEP. Cells were lysed by adding 2 ml 10X FastBreak buffer (Promega V8571) and 5 µl Benzonase, incubated for 15-20 min at RT, and spun at 38000g for 15 min at 4°C and the supernatant collected. Ni-NTA resin was washed in an equilibration buffer (50 mM Tris pH 8, 500 mM NaCl and 10% glycerol). The supernatant was then incubated with 1 ml of this pre-washed Ni-NTA resin at 4°C for 1 h. The sample was poured into a disposable column and washed with wash buffer (20 ml of 50 mM Tris pH 8, 500 mM NaCl and 10% glycerol, 20 mM Imidazole and 2 mM TCEP). The sample was then eluted using elution buffer containing 5 ml 50 mM Tris pH 8, 500 mM NaCl and 10% glycerol, 400 mM Imidazole and 2 mM TCEP. The eluted Cas9 protein was diluted 1-2 fold with 1X PBS and loaded onto a 5 ml heparin column equilibrated with 1X PBS. The sample was eluted in a linear salt gradient from 0.1 to 1 M NaCl in 1X PBS and 1 ml fractions were collected. Fractions were analyzed on a gel and pooled all Cas9 containing fractions followed by concentrating them down to 3 ml volume with Amicon Ultra-15 filter (30 kDa cutoff, spun 4000 g 20 min at 4 °C). We exchanged the buffer to 1X PBS, 10% glycerol and 2 mM TCEP using a PD-10 column. The insoluble protein was spun down at 4°C for 15 min and concentrated down to

a final volume of 500  $\mu$ l. Purified Cas9 was filter sterilized (0.22  $\mu$ m) and the final concentration was measured by Nanodrop and stored at -80°C.

### **Microinjection and CRISPR/Cas9-triggered homologous recombination**

All CRISPR edits and insertions required to generate the SKI LODGE strains were performed using the CRISPR protocol developed by (Paix *et al.* 2015). Briefly, homology repair templates were amplified by PCR, using primers that introduced a minimum stretch of 35 bp homology to the SKI LODGE cassette at both ends. (For more information please see the step-by-step guide – File S2). CRISPR injection mix reagents were added in the following order: 0.375  $\mu$ l Hepes pH 7.4 (200mM), 0.25  $\mu$ l KCl (1M), 2.5  $\mu$ l tracrRNA (4  $\mu$ g/ $\mu$ l), 0.6  $\mu$ l *dpy-10* crRNA (2.6  $\mu$ g/ $\mu$ l) or 0.5  $\mu$ l *dpy-5* crRNA (8  $\mu$ g/ $\mu$ l), 0.25  $\mu$ l *dpy-10* ssODN (500 ng/ $\mu$ l) or 0.5  $\mu$ l *dpy-5* ssODN (1000 ng/ $\mu$ l), and PCR repair template(s) up to 500 ng/ $\mu$ l final in the mix. Water was added to reach a final volume of 8  $\mu$ l. 2  $\mu$ l purified Cas9 (12  $\mu$ g/ $\mu$ l) added at the end, mixed by pipetting, spun for 2 min at 13000 rpm and incubated at 37°C for 10 min. Mixes were microinjected into the germ line of day 1 adult hermaphrodite worms using standard methods (Evans 2006).

### **SKI LODGE cassettes construction**

All strains were generated by CRISPR protocol described above using at least 35 bp of homology as recombination arms (Figure S1, see Table 3 for a list of all primer sequences used for generate homologous recombination templates by PCR, Table 2 for a list of all crRNA used and Table 1 for all strains generated in this work). In order to introduce the *dpy-10* site into the SKI LODGE cassettes, we established another easily identifiable Co-CRISPR target gene, *dpy-5*. *dpy-5* gene has only one exon and a well-defined dumpy phenotype (Brenner 1974). After each edit, the modified strains were outcrossed to remove the Co-CRISPR marker mutation (*dpy-10* or *dpy-5*), as well as any additional unwanted off-site mutations. To generate the *myo-3* SKI LODGE on chromosome I:28510000 (Figure S1), 2573 bp of *myo-3* promoter was introduced, using *dpy-10* as a Co-CRISPR marker. Then, 806 bp of *3xFLAG::dpy-10 site::unc-54 3'UTR* cassette was added, using *dpy-5* as a Co-CRISPR marker. The *pie-1* SKI LODGE on chromosome III:70077000, the *rab-3* SKI LODGE on chromosome IV:50149000, *eft-3* SKI LODGE on chromosome V:86448000, and *eft-3* SKI LODGE on chromosome IV:50149000 were each made using two HR repair templates with overlapping sequence that were co-injected as part of the same

CRISPR mix, using *dpy-5* as Co-CRISPR marker (Figure S1). The templates to make or the *pie-1* cassette were 1166 bp of *pie-1* promoter and 806 bp of *3xFLAG::dpy-10 site::unc-54 3'UTR*. The templates to make the *rab-3* cassette, were 1405 bp of *rab-3p::3xFLAG::dpy-10 site* and 732 bp of *rab-3 3' UTR*. The templates to make the *eft-3* cassette on chromosome V were 682 bp of the *eft-3* promoter and 836 bp of *3xFLAG::dpy-10 site::unc-54 3'UTR*. The templates to make the *eft-3* cassette on chromosome IV were 687 bp of the *eft-3* promoter and 804 bp of *3xFLAG::dpy-10 site::unc-54 3'UTR*. *eft-3* and *rab-3* SL2 lines (Table 1) were generated introducing 402 bp of *dpy-10 site::gpd-2 SL2* between 3xFLAG and wrmScarlet in *eft-3p::3xFLAG::wrmScarlet* and *rab-3p::3xFLAG::wrmScarlet* strains, using *dpy-5* as Co-CRISPR marker. The *ges-1* SL2 line was generated by swapping out the *eft-3* promoter for 2081 bp of the *ges-1* promoter in the *eft-3* SL2 line. All final SKI LODGE strains were sequence verified and outcrossed at least six times to N2.

### Screening worms with the dumpy phenotype and genotyping

Immediately after injection, individual worms were placed at 20°C. 3-4 days after injection, all plates were screened for progeny that contained the relevant Co-CRISPR edit. ~150 F1 dumpy/roller animals were singled out, one per plate, to lay eggs. After 2 days, F1 worms were placed in 5 µl of single worm lysis buffer (30 mM Tris pH 8.0, 8 mM EDTA pH 8, 100 mM NaCl, 0.7% NP-40, 0.7% Tween-20 and 100 µg/ml proteinase K) and lysed for 1 h at 60 °C, followed by incubation at 95 °C to inactivate the proteinase K. We then screened for the CRISPR edit by PCR using Apex Taq RED Master Mix 2.0X (Genesee Scientific) as recommended by the manufacturer, using 1 µl of worm lysate as a template (see Table 3 for a list of all primers used for PCR genotyping). F2 progeny from those plates that genotyped positive for the desired edit were again genotyped and used to amplify the full cassette. PCR amplicons were then purified using the QIAquick PCR purification kit (Qiagen) as recommended by the manufacturer. Purified PCR products were then sequenced by Sanger sequencing methods (Genewiz).

### Verification of SKI LODGE expression

SKI LODGE strains were tested by knock-in of 696 bp of wrmScarlet amplified from pSEM89 (Mouridi *et al.* 2017) and or by knock-in of 867 bp of eGFP amplified from pIM26. A minimum of 35 bp were used as homologous recombination arms. To generate single-strand ended wrmScarlet template we followed the protocol developed by (Dokshin *et al.* 2018). Briefly, two

PCR products were generated, one with 120 bp homology arms and the other without any homology arms (only insert sequence). PCR products were mixed 1:1 (equal concentrations), and then this mix was heat to 95 °C and cool to 4 °C: 95 °C (2 min), 85 °C (10 sec), 75 °C (10 sec), 65 °C (10 sec), 55 °C (1 min), 45 °C (30 sec), 35 °C (10 sec), 25 °C (10 sec), and 4 °C (forever). Then this PCR donor cocktail was used as template in the CRISPR mix described above.

### **Verification of off-target events**

Off-targets sites of *dpy-5* and *dpy-10* were obtained using IDT platform. To verify off-target events of *dpy-5* in the SKI LODGE strains, potential off-target sites (~900 bp) in at least three genes were amplified by PCR (Table 3) and then sequenced by Sanger sequencing methods (Genewiz). These three genes represent the closest genes to the respective SKI LODGE genomic region. It is important to note that each potential off-target sequence of the *dpy-5* crRNA has at least two mismatches to the *dpy-5* crRNA sequence. To verify off-target events for *dpy-10* in the tested SKI LODGE strains, a fragment of R12E2.15 gene (873 bp) was amplified by PCR (Table 3) and then sequenced by Sanger sequencing methods (Genewiz). All sequence files from sequencing are available on request.

### **Analysis of phenotypes**

To study the fertility of SKI LODGE strains, seven hermaphrodites were individually selected at the L4 larval stage and transferred to new OP50-1 plates every 24 h over the course of 6 days at 20°C. Plates were scored for dead embryos and viable offspring. Embryos that did not hatch within 24 h after being laid were considered dead.

To analyze developmental timing, animals were synchronized by bleaching. After bleaching, embryos were incubated overnight at 20° C in 1X M9 buffer and gentle rocking to allow hatching. After overnight incubation, OP50-1 plates were seeded with L1 larvae. Developmental stages were evaluated every 24 hours under a dissecting scope and scored for frequency of each developmental stage present.

Lifespan experiments were performed as described previously (Burkewitz *et al.* 2015). Before the start of each lifespan experiment, gravid adult worms were bleached and eggs were seeded on HT115 bacteria (100 eggs per plate) at 20° C until they reached adulthood (72 hr), at which point 100 adult worms per treatment were transferred to fresh plates with 20 worms per plate. Worms

were transferred to fresh plates every other day until reproduction had ceased (day 10-12). Survival was scored every 1–2 days and a worm was deemed dead when unresponsive to 3 taps on the head and tail. Worms were censored due to contamination on the plate, if they crawled up onto the walls, had eggs hatching inside, or exhibited pronounced vulval protrusion.

### **Microscopy**

DIC and fluorescence imaging of whole worms was performed using a Zeiss Discovery V8 and Apotome.2-equipped Imager M2 microscope equipped with Axiocam cameras. Worms were anesthetized in 40 mM Sodium Azide diluted in 1X M9 and mounted on 2% agarose pads on glass slides.

### **Statistical analysis**

GraphPad Prism was used for statistical analyses. Mann-Whitney test was used to analyze fertility and embryonic lethality. The Log-rank (Mantel-Cox) analysis was used to compare survival curves:  $n = 85-100$  worms. For all experiments  $p$  values  $< 0.05$  were considered significant.

### **Ethics statement**

*C. elegans* is not protected under most animal research legislation.

**Table 3. Oligonucleotides used in this work.**

| Oligo name | Sequence 5' > 3'                                                  | Template                                           | SKI LODGE line                       |
|------------|-------------------------------------------------------------------|----------------------------------------------------|--------------------------------------|
| CGSG 118   | gaatctcactctgatgagcgtatctatcaagtccttgtagtgatta<br>tagtctctgttttc  | <i>myo-3</i> promoter                              | <i>myo-3</i>                         |
| CGSG 178   | cgcaagtcggcgatttcttgaagtttgtcaaaagaagagatg<br>gatctagtggtcgtgg    | <i>myo-3</i> promoter                              | <i>myo-3</i>                         |
| CGSG 143   | taagcttctcacaccttttctctcg                                         | genotyping                                         | <i>myo-3</i>                         |
| CGSG 163   | accttttgcggccagacc                                                | genotyping                                         | <i>myo-3</i>                         |
| CGSG 124   | cctcccctcatctcaattatcccg                                          | genotyping                                         | <i>myo-3</i>                         |
| CGSG 150   | cttgacttggtacgtgatggc                                             | genotyping                                         | <i>myo-3</i>                         |
| CGSG 151   | gattgcgaccgtgtgttc                                                | genotyping                                         | <i>myo-3</i>                         |
| CGSG 120   | ggcaggaggccatcaaaccacgaccactagatccatatgga<br>ctacaaagaccatgacgg   | <i>3xFLAG::dpy-10</i><br><i>site::unc-54 3'UTR</i> | <i>myo-3</i>                         |
| CGSG 182   | caattcggcgatctcttgaagtttgtcaaaagaagagcttcca<br>ctgagcctcaaacc     | <i>3xFLAG::dpy-10</i><br><i>site::unc-54 3'UTR</i> | <i>myo-3</i>                         |
| CGSG 123   | ggattcttctgttcaaccagc                                             | genotyping                                         | <i>myo-3</i>                         |
| CGSG 140   | ataaagatcatgacatcgattacaaggatgacgatgacaagggt<br>cagcaaggagagggcag | wrmScarlet                                         | <i>myo-3, pie-1,</i><br><i>eft-3</i> |
| CGSG 141   | aattggacttagaagtcagaggcacggcgcgagatgttactt<br>gtagagctcgtccattc   | wrmScarlet                                         | <i>myo-3, pie-1,</i><br><i>eft-3</i> |
| CGSG 117   | aataggggggtgggagcacag                                             | genotyping                                         | <i>myo-3, pie-1,</i><br><i>eft-3</i> |
| CGSG 180   | actttttgagttaaataaatgaggtatatagttaaataaaaaatcg<br>agaaaaaatggcg   | <i>pie-1</i> promoter                              | <i>pie-1</i>                         |
| CGSG 181   | ttataatcaccgtcatgtgttctttagtccatctggaaaagaaaat<br>ttgatttttaattg  | <i>pie-1</i> promoter                              | <i>pie-1</i>                         |
| CGSG 179   | ttcccaaacaattaaaaatcaattttctttccagatggactaca<br>aagaccatgacgg     | <i>3xFLAG::dpy-10</i><br><i>site::unc-54 3'UTR</i> | <i>pie-1</i>                         |
| CGSG 128   | atgctctccagttgaagatctgaagccatatacctcgtcttcca<br>ctgagcctcaaacc    | <i>3xFLAG::dpy-10</i><br><i>site::unc-54 3'UTR</i> | <i>pie-1</i>                         |
| CGSG 129   | cctgggaacaataagtcggtgaag                                          | genotyping                                         | <i>pie-1</i>                         |
| CGSG 130   | cggcggcaaaaatggatttctc                                            | genotyping                                         | <i>pie-1</i>                         |
| CGSG 131   | atgtctggcggtccaaagtg                                              | genotyping                                         | <i>pie-1</i>                         |
| CGSG 209   | aaagatcatgacatcgattacaaggatgacgatgacaagagta                       | GFP                                                | <i>pie-1</i>                         |

|                                                       |                                                                       |                                          |                 |
|-------------------------------------------------------|-----------------------------------------------------------------------|------------------------------------------|-----------------|
|                                                       | aaggagaagaacttttc                                                     |                                          |                 |
| CGSG 210                                              | taattggacttagaagtcagaggcacgggcgcgagatgctatt<br>tgtatagttcatccatg      | GFP                                      | <i>pie-1</i>    |
| CGSG 100                                              | cacagttcatcgactagtgtgagacaagtgtgaaactaaattca<br>gatgggagcagtgagac     | <i>rab-3p::3xFLAG::dpy-10 site</i>       | <i>rab-3</i>    |
| CGSG 193                                              | attttgagttttatagatagataatagaacgtagaatttgctcgc<br>ctaccataggcac        | <i>rab-3p::3xFLAG::dpy-10 site</i>       | <i>rab-3</i>    |
| CGSG 194                                              | acaagtaccgctcgtggtgcctatggtagcggagcaaattcta<br>cgttctattatactatc      | <i>rab-3 3'UTR</i>                       | <i>rab-3</i>    |
| CGSG 166                                              | tcctcctttaagttacgattattaacaaaatgtgcctaagacctc<br>tggaactcttcgcc       | <i>rab-3 3'UTR</i>                       | <i>rab-3</i>    |
| CGSG 104                                              | gaactttgcagtttggtgtagtgtg                                             | genotyping                               | <i>rab-3</i>    |
| CGSG 105                                              | ctacagtagccctattttcagatgac                                            | genotyping                               | <i>rab-3</i>    |
| CGSG 106                                              | tcaatccggttcatttgagccc                                                | genotyping                               | <i>rab-3</i>    |
| CGSG 168                                              | ggaaaactgagagctacgcgc                                                 | genotyping                               | <i>rab-3</i>    |
| CGSG 204                                              | tgagttttatagatagataatagaacgtagaattttactgttag<br>agctcgtccattc         | wrmScarlet                               | <i>rab-3</i>    |
| oxTi365 eft-3p HR<br>templ FOR                        | ctaattgcaccgtttcgtcgcgtgctgcctccccggcaccttgg<br>tctttattgtcaac        | <i>eft-3 promoter</i>                    | <i>eft-3</i>    |
| oxTi365 eft-3p HR<br>templ REV                        | tgatctttataatcacctgcatggtctttgtagtcattgagcaaa<br>gtgtttccaactg        | <i>eft-3 promoter</i>                    | <i>eft-3</i>    |
| oxTi365 3xFLAG<br>dpy-10 unc-54 3'UTR<br>HR templ FOR | attgtttttttcagttgggaaacactttgctcaatggactacaaa<br>gaccatgacggtg        | <i>3xFLAG::dpy-10 site::unc-54 3'UTR</i> | <i>eft-3</i>    |
| oxTi365 3xFLAG<br>dpy-10 unc-54 3'UTR<br>HR templ REV | ggagaaggaccgagtagaacaagttgggacaatacttcact<br>gagcctcaaaccacaaacc      | <i>3xFLAG::dpy-10 site::unc-54 3'UTR</i> | <i>eft-3</i>    |
| eft-3p FOR RPT Chr<br>IV                              | cacagttcatcgactagtgtgagacaagtgtgaaactaaagca<br>cctttggctttttattgtcaac | <i>eft-3 promoter</i>                    | <i>eft-3 IV</i> |
| CGSG 103                                              | ctcctttaagttacgattattaacaaaatgtgcctaagcttcac<br>tgagcctcaaacc         | <i>3xFLAG::dpy-10 site::unc-54 3'UTR</i> | <i>eft-3 IV</i> |
| MosCRIS eft3 geno<br>FOR                              | tcttgccgctctcctcattttccc                                              | genotyping                               | <i>eft-3</i>    |
| MosCRIS eft3 geno<br>REV                              | ttagccaccttctcacacagggc                                               | genotyping                               | <i>eft-3</i>    |
| eft-3p seq fwd_2                                      | ctaccgtccgcactcttctta                                                 | genotyping                               | <i>eft-3</i>    |
| CGSG 205                                              | accttcgacctcactttccctc                                                | genotyping                               | <i>eft-3</i>    |

|                       |                                                                                                                                 |                                                           |                                      |
|-----------------------|---------------------------------------------------------------------------------------------------------------------------------|-----------------------------------------------------------|--------------------------------------|
| CGSG 206              | cgcctcgaagtataccagatcc                                                                                                          | genotyping                                                | <i>eft-3</i>                         |
| <i>dpy-10</i> ssODN   | cacttgaactcaatacggcaagatgagaatgactggaaccg<br>taccgcatgcggcgctatggtagcggagctcacatggcttca<br>gaccaacagcctat                       | repair template                                           | <i>dpy-10</i> gene                   |
| <i>dpy-5</i> ssODN    | gattccgtgtttcctggctctccacgatcctggcattcctg<br>ggcgctcagcgact                                                                     | repair template                                           | <i>dpy-5</i> gene                    |
| SL2 SKIs F1           | acgataagtaccgctcgtggcgctatggtagcggagcgctgt<br>ctcatcctacttcacc                                                                  | SL2 template                                              | <i>eft-3, rab-3</i>                  |
| SL2 scarlet R1        | aacgcatgaactccttgataactgcctctcccttgctgacctga<br>tgcggtgaagcagtt                                                                 | SL2 template                                              | <i>eft-3, rab-3</i>                  |
| SL2 SKIs F2           | gggtgattataaagatcatgacatcgattacaaggatgacgacg<br>ataagtaccgctcgtgg                                                               | SL2 template                                              | <i>eft-3, rab-3</i>                  |
| TIR1 R2               | cgtgtccgttcattggatccctccatgtggacctgaaacgcatg<br>aactccttgata                                                                    | SL2 template                                              | <i>eft-3, rab-3</i>                  |
| CGSG 246              | gtctcttcactcactcacactattcccaaatctagactcatctatca<br>ctaattgcaccgtttcgtcgcgtgctgcctccccgaaactccga<br>actatgatgacg                 | <i>ges-1</i> promoter                                     | <i>ges-1</i>                         |
| CGSG 241              | tccgctaccataggcaccagagcggtacttgcacgctcatcc<br>ttgtaatcgtatgatgatctttataatcaccgcatggtccttata<br>atccatgaattcaaagataagatatgtaatag | <i>ges-1</i> promoter                                     | <i>ges-1</i>                         |
| CGSG 167              | caatacagagcgttcgaggg                                                                                                            | genotyping                                                | <i>eft-3</i> SL2<br><i>rab-3</i> SL2 |
| CGSG 285              | ttgagcttggcgggttggg                                                                                                             | genotyping                                                | <i>eft-3</i> SL2<br><i>rab-3</i> SL2 |
| <i>ges-1p</i> INT SEQ | cgtctgcgtcttacagtccaggc                                                                                                         | genotyping                                                | <i>ges-1</i> SL2                     |
| CGSG 249              | aggcctttagctacgtcctg                                                                                                            | sequencing <i>dpy-5</i> off-<br>target ( <i>col-8</i> )   | <i>pie-1</i>                         |
| CGSG 250              | ccgcgccattactaaagacacc                                                                                                          | sequencing <i>dpy-5</i> off-<br>target ( <i>col-8</i> )   | <i>pie-1</i>                         |
| CGSG 251              | tcaagacctggctctccacag                                                                                                           | sequencing <i>dpy-5</i> off-<br>target ( <i>emb-9</i> )   | <i>pie-1</i>                         |
| CGSG 252              | tccaggaattccaggctaccc                                                                                                           | sequencing <i>dpy-5</i> off-<br>target ( <i>emb-9</i> )   | <i>pie-1</i>                         |
| CGSG 253              | gtcctcgaagaagactcctccg                                                                                                          | sequencing <i>dpy-5</i> off-<br>target ( <i>col-92</i> )  | <i>pie-1</i>                         |
| CGSG 254              | tgcaagcactctgctcgtg                                                                                                             | sequencing <i>dpy-5</i> off-<br>target ( <i>col-92</i> )  | <i>pie-1</i>                         |
| CGSG 255              | accagatggagacgggtgctc                                                                                                           | sequencing <i>dpy-5</i> off-<br>target ( <i>let-526</i> ) | <i>myo-3</i>                         |

|          |                          |                                                       |                                   |
|----------|--------------------------|-------------------------------------------------------|-----------------------------------|
| CGSG 256 | tcagcaacaagctgctgctc     | sequencing <i>dpy-5</i> off-target ( <i>let-526</i> ) | <i>myo-3</i>                      |
| CGSG 257 | caagctggacaagatggacaacc  | sequencing <i>dpy-5</i> off-target ( <i>col-51</i> )  | <i>myo-3</i>                      |
| CGSG 258 | gacgtctgtagctccagcac     | sequencing <i>dpy-5</i> off-target ( <i>col-51</i> )  | <i>myo-3</i>                      |
| CGSG 259 | agatggacgagaagagcaaggg   | sequencing <i>dpy-5</i> off-target ( <i>col-48</i> )  | <i>myo-3</i>                      |
| CGSG 260 | ctaatacctggagcaagacgtgc  | sequencing <i>dpy-5</i> off-target ( <i>col-48</i> )  | <i>myo-3</i>                      |
| CGSG 261 | gacagattcccttctctctggag  | sequencing <i>dpy-5</i> off-target ( <i>col-43</i> )  | <i>eft-3</i>                      |
| CGSG 262 | gagctcagcttctgcaaggtac   | sequencing <i>dpy-5</i> off-target ( <i>col-43</i> )  | <i>eft-3</i>                      |
| CGSG 263 | tgagaagatcggagagctcaagg  | sequencing <i>dpy-5</i> off-target ( <i>col-142</i> ) | <i>eft-3</i>                      |
| CGSG 264 | cagctgaacgagctggacatg    | sequencing <i>dpy-5</i> off-target ( <i>col-142</i> ) | <i>eft-3</i>                      |
| CGSG 281 | gtccatcgatccagcatttc     | sequencing <i>dpy-5</i> off-target ( <i>col-145</i> ) | <i>eft-3</i>                      |
| CGSG 282 | accgtccatccctctacaac     | sequencing <i>dpy-5</i> off-target ( <i>col-145</i> ) | <i>eft-3</i>                      |
| CGSG 267 | gacgtctcgatctaattgcctagg | sequencing <i>dpy-5</i> off-target ( <i>col-114</i> ) | <i>rab-3</i>                      |
| CGSG 268 | cctccagttattgaagctgctgg  | sequencing <i>dpy-5</i> off-target ( <i>col-114</i> ) | <i>rab-3</i>                      |
| CGSG 279 | aagaagactcctccgtcgatagc  | sequencing <i>dpy-5</i> off-target ( <i>col-34</i> )  | <i>rab-3</i>                      |
| CGSG 280 | caatggtctacaactacgtgcacc | sequencing <i>dpy-5</i> off-target ( <i>col-34</i> )  | <i>rab-3</i>                      |
| CGSG 283 | ttatgccgtgcttfcggtag     | sequencing <i>dpy-5</i> off-target ( <i>dpy-13</i> )  | <i>rab-3</i>                      |
| CGSG 284 | ccaggtgtcctgaaagatgtgg   | sequencing <i>dpy-5</i> off-target ( <i>dpy-13</i> )  | <i>rab-3</i>                      |
| CGSG 273 | gttggtatgctcctcctgtg     | sequencing <i>dpy-10</i> off-target (R12E2.15)        | <i>pie-1, myo-3, eft-3, rab-3</i> |
| CGSG 274 | agaagactacatacgacggctgg  | sequencing <i>dpy-10</i> off-target (R12E2.15)        | <i>pie-1, myo-3, eft-3, rab-3</i> |

## REFERENCES

- Brenner, S., 1974 The genetics of *Caenorhabditis elegans*. *Genetics* 77: 71–94.
- Burkewitz, K., I. Morante, H. J. M. Weir, R. Yeo, Y. Zhang *et al.*, 2015 Neuronal CRTG-1 Governs Systemic Mitochondrial Metabolism and Lifespan via a Catecholamine Signal. *Cell* 160: 842–855.
- Dokshin, G. A., K. S. Ghanta, K. M. Piscopo, and C. C. Mello, 2018 Robust Genome Editing with Short Single-Stranded and Long, Partially Single-Stranded DNA Donors in *Caenorhabditis elegans*. *Genetics* 210: 781–787.
- Evans, T., 2006 Transformation and microinjection. *WormBook*.
- Frøkjær-Jensen, C., W. vis, M. Sarov, J. Taylor, S. Flibotte *et al.*, 2014 Random and targeted transgene insertion in *Caenorhabditis elegans* using a modified Mos1 transposon. *Nature Methods* 11: nmeth.2889.
- Mouridi, S., C. Lecroisey, P. Tardy, M. Mercier, A. Leclercq-Blondel *et al.*, 2017 Reliable CRISPR/Cas9 Genome Engineering in *Caenorhabditis elegans* Using a Single Efficient sgRNA and an Easily Recognizable Phenotype. *G3: Genes, Genomes, Genetics* 7: 1429–1437.
- Paix, A., A. Folkmann, D. Rasoloson, and G. Seydoux, 2015 High Efficiency, Homology-Directed Genome Editing in *Caenorhabditis elegans* Using CRISPR-Cas9 Ribonucleoprotein Complexes. *Genetics* 201: 47–54.
